# Supplementary material
Source: PubMed Central journal article supplement (PMC2773728)
Supplement: supp_2.11-12.612_003582-TableS1.pdf [file supp_2.11-12.612_003582-TableS1.pdf]

**Table S1. Parameters that were not altered by Kv1.1 transduction**

|                                 | CT              | WT               | RX              | TR              |
|---------------------------------|-----------------|------------------|-----------------|-----------------|
| Resting membrane potential (mV) | -64.6±1.9 (27)  | -60.2±3.5 (37)   | -62.9±1.8 (41)  | -64.2±1.9 (30)  |
| Capacitance (pF)                | 70±5.1 (29)     | 64±3.3 (37)      | 66±3.6 (41)     | 77.7±5.5 (30)   |
| Input resistance (MΩ)           | 365.9±20.9 (90) | 344.7±18.8 (102) | 339.2±19.0 (97) | 303.5±21.8 (61) |
| Spike voltage threshold (mV)    | -25.3±1.3 (18)  | -25.1±1.2 (25)   | -29.2±2.3 (15)  | -23.9±1.8 (12)  |
| Spike amplitude (mV)            | 57.4±2.3 (18)   | 52.7±2.2 (25)    | 56.7±3.0 (15)   | 55.8±2.6 (12)   |

Data are given as mean±s.e.m. (n).
