# Supplementary material
Source: PubMed Central journal article supplement (PMC2773728)

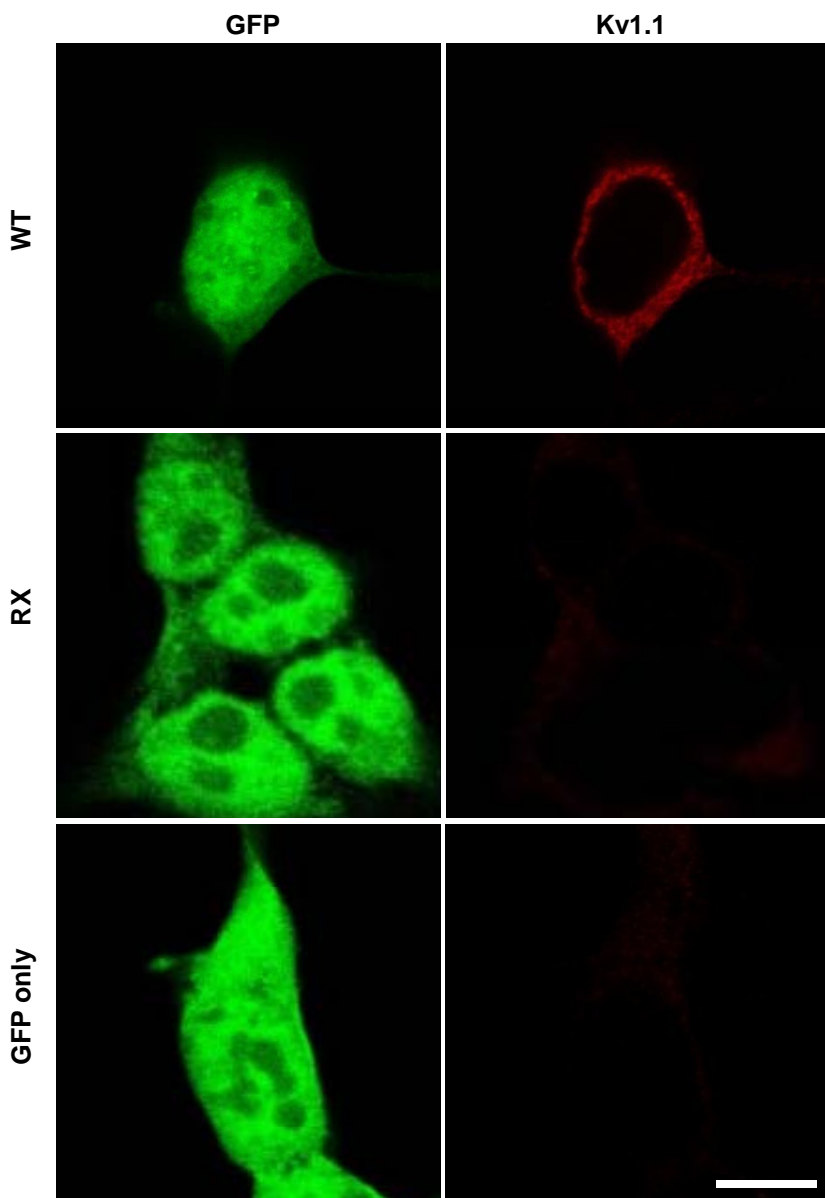

Supplement: supp_2.11-12.612_003582-FigS1.pdf [file supp_2.11-12.612_003582-FigS1.pdf]

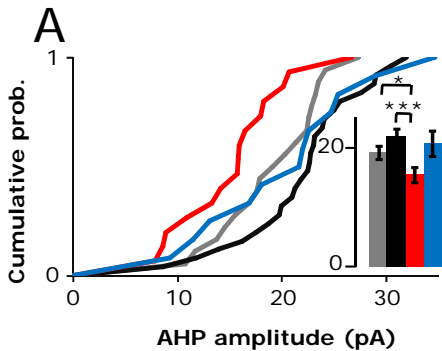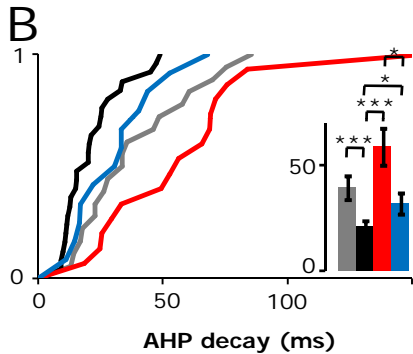

Supplement: supp_2.11-12.612_003582-FigS2.pdf [file supp_2.11-12.612_003582-FigS2.pdf]

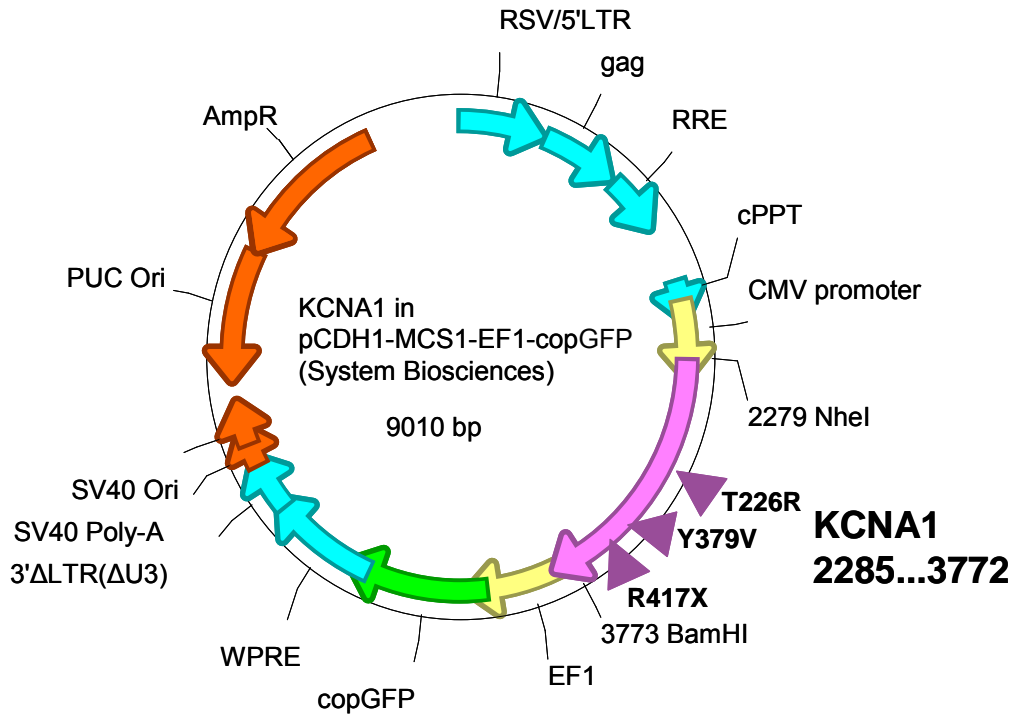

Supplement: supp_2.11-12.612_003582-FigS3.pdf [file supp_2.11-12.612_003582-FigS3.pdf]
